# Supplementary material for: Inflammatory Cytokines in General and Central Obesity and Modulating Effects of Physical Activity
Source: PubMed Central journal article supplement (PMC4363366; doi:10.1371/journal.pone.0121971), 2015-03-17
Supplement: pone.0121971.s001.pdf [file pone.0121971.s001.pdf]

**Supporting Information 1: Cytokine levels in subjects with high versus low physical activity determined by average energy expenditure during the wake-phase.**

|                                   | Physical Activity determined by average METs |                                  |                                |                                 |                                 |                                  |                                |                                 |                                 |                                  |                                |                                 |
|-----------------------------------|----------------------------------------------|----------------------------------|--------------------------------|---------------------------------|---------------------------------|----------------------------------|--------------------------------|---------------------------------|---------------------------------|----------------------------------|--------------------------------|---------------------------------|
|                                   | Total Sample (N = 140)                       |                                  |                                |                                 | Obese Sample (N = 80)           |                                  |                                |                                 | Non-Obese Sample (N = 60)       |                                  |                                |                                 |
|                                   | Low energy<br>(< 1.500<br>METs)              | High energy<br>(≥ 1.500<br>METs) | ANOVA<br>p-values <sup>B</sup> | ANCOVA<br>p-values <sup>C</sup> | Low energy<br>(< 1.200<br>METs) | High energy<br>(≥ 1.200<br>METs) | ANOVA<br>p-values <sup>B</sup> | ANCOVA<br>p-values <sup>C</sup> | Low energy<br>(≤ 1.951<br>METs) | High energy<br>(> 1.951<br>METs) | ANOVA<br>p-values <sup>B</sup> | ANCOVA<br>p-values <sup>C</sup> |
| <b>Age</b>                        | 42.73 ± 12.94                                | 34.34 ± 12.55                    | 0.0002                         | -                               | 43.90 ± 13.92                   | 40.10 ± 12.32                    | 0.1998                         | -                               | 33.77 ± 13.16                   | 34.07 ± 11.55                    | 0.9255                         | -                               |
| <b>BMI</b>                        | 44.86 ± 8.00                                 | 25.54 ± 6.30                     | <0.0001                        | -                               | 47.36 ± 7.07                    | 40.86 ± 7.29                     | 0.0001                         | -                               | 24.21 ± 3.06                    | 22.41 ± 2.60                     | 0.0172                         | -                               |
| <b>IL-2 [pg/ml]<sup>A</sup></b>   | 1.66 ± 1.19                                  | 1.43 ± 1.03                      | 0.2042                         | 0.3736                          | 1.83 ± 1.18                     | 1.44 ± 1.15                      | 0.1349                         | 0.6276                          | 1.49 ± 1.10                     | 1.36 ± 0.95                      | 0.6143                         | 0.5433                          |
| <b>IL-4 [pg/ml]<sup>A</sup></b>   | 1.53 ± 0.52                                  | 1.42 ± 0.43                      | 0.1947                         | 0.7540                          | 1.57 ± 0.57                     | 1.46 ± 0.42                      | 0.3253                         | 0.8187                          | 1.48 ± 0.46                     | 1.38 ± 0.44                      | 0.4083                         | 0.4071                          |
| <b>IL-5 [pg/ml]<sup>A</sup></b>   | 1.31 ± 0.62                                  | 1.02 ± 0.63                      | 0.0064                         | 0.4590                          | 1.37 ± 0.62                     | 1.29 ± 0.61                      | 0.5530                         | 0.8604                          | 0.93 ± 0.64                     | 0.98 ± 0.62                      | 0.7426                         | 0.5687                          |
| <b>IL-10 [pg/ml]<sup>A</sup></b>  | 1.45 ± 0.93                                  | 1.10 ± 1.04                      | 0.0418                         | 0.8473                          | 1.57 ± 0.96                     | 1.22 ± 0.81                      | 0.0856                         | 0.3740                          | 1.22 ± 1.23                     | 1.02 ± 0.98                      | 0.5069                         | 0.8909                          |
| <b>IL-12 [pg/ml]<sup>A</sup></b>  | 2.22 ± 1.02                                  | 1.95 ± 1.04                      | 0.1276                         | 0.1740                          | 2.42 ± 0.92                     | 2.06 ± 1.04                      | 0.1094                         | 0.4566                          | 1.94 ± 1.18                     | 1.83 ± 0.94                      | 0.6968                         | 0.8646                          |
| <b>IL-13 [pg/ml]<sup>A</sup></b>  | 1.79 ± 0.66                                  | 1.52 ± 0.80                      | 0.0312                         | 0.7325                          | 1.88 ± 0.67                     | 1.65 ± 0.65                      | 0.1251                         | 0.4841                          | 1.59 ± 0.79                     | 1.41 ± 0.85                      | 0.3905                         | 0.5654                          |
| <b>GM-CSF [pg/ml]<sup>A</sup></b> | 3.46 ± 0.72                                  | 3.33 ± 0.54                      | 0.2606                         | 0.2402                          | 3.48 ± 0.82                     | 3.43 ± 0.56                      | 0.7687                         | 0.5301                          | 3.37 ± 0.53                     | 3.26 ± 0.55                      | 0.4001                         | 0.4573                          |
| <b>IFN-γ [pg/ml]<sup>A</sup></b>  | 4.77 ± 0.63                                  | 4.55 ± 0.77                      | 0.0660                         | 0.5020                          | 4.83 ± 0.67                     | 4.74 ± 0.63                      | 0.5383                         | 0.8965                          | 4.61 ± 0.51                     | 4.37 ± 0.95                      | 0.2249                         | 0.1703                          |
| <b>TNF-α [pg/ml]<sup>A</sup></b>  | 3.38 ± 0.67                                  | 3.20 ± 0.65                      | 0.0968                         | 0.3160                          | 3.50 ± 0.72                     | 3.28 ± 0.64                      | 0.1683                         | 0.4919                          | 3.17 ± 0.61                     | 3.13 ± 0.56                      | 0.7674                         | 0.7481                          |

Legend: <sup>A</sup> all cytokines transformed using formula LN(X+1), <sup>B</sup> ANOVA with energy group as factor, <sup>C</sup> ANCOVA with energy group as factor and BMI as covariate

Bonferroni-correction for Multiple Testing:  $\alpha(0.05) \rightarrow p = .0055$ ;  $\alpha(0.01) \rightarrow p = .0011$
